# Supplementary material for: Cationic long-chain hyperbranched poly(ethylene glycol)s with low charge density for gene delivery
Source: Royal Society of Chemistry journal article supplement (doi:10.1039/c2py20523h), 2012-08-30
Supplement: c2py20523h.pdf [file c2py20523h.pdf]

# Cationic long-chain hyperbranched poly(ethylene glycol)s with low charge density for gene delivery

Chunlai Tu,<sup>†,§</sup> Nan Li,<sup>‡,§</sup> Lijuan Zhu,<sup>†</sup> Linzhu Zhou,<sup>†</sup> Yue Su,<sup>†</sup> Peiyong Li,<sup>\*,‡</sup> and Xinyuan Zhu<sup>\*,†</sup>

<sup>†</sup>School of Chemistry and Chemical Engineering, State Key Laboratory of Metal Matrix Composites, Shanghai Jiao Tong University, 800 Dongchuan Road, Shanghai 200240, P. R. China

<sup>‡</sup>Department of Nuclear Medicine, Ruijin Hospital, School of Medicine, Shanghai Jiao Tong University, 197 Ruijin 2nd Road, Shanghai 200025, China

E-mail: xyzhu@sjtu.edu.cn (X. Z.); peiyli@vip.sina.com (P. L.).

\* To whom correspondence should be addressed. Tel.: +86-21-34205699; Fax: +86-21-34205722

§ These authors are joint first authors.

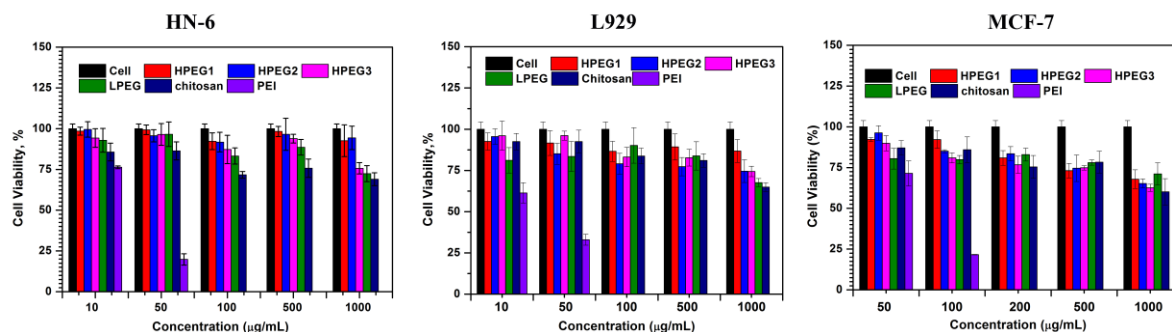

Fig. S1 Cytotoxicity of HPEG1, HPEG2, HPEG3, LPEG, chitosan and PEI in HN-6, L929 and MCF-7 cell lines evaluated by MTT assay.

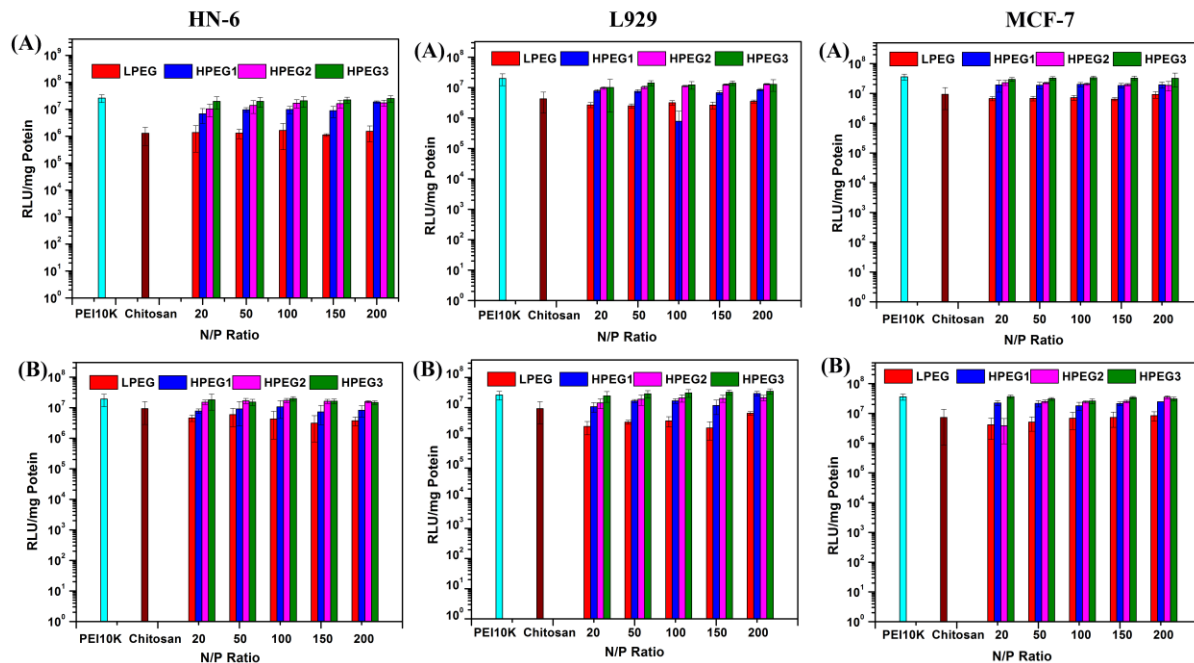

**Fig. S2** Transfection efficiency of LPEG/pDNA polyplexes, HPEGs/pDNA polyplexes at various N/P ratios and linear PEI (10 kDa)/pDNA polyplexes and chitosan/pDNA polyplexes at the N/P ratio of 10 in HN-6, L929 and MCF-7 cell line cells in different media: (A) DMEM with serum, (B) serum-free DMEM. Luciferase expression levels were measured 48 h later. Results are presented as the mean±SD (n = 6).
